# THE AMERICAN JOURNAL OF PSYCHIATRY

February 2011

Vol. 168, No. 2:111-230

THE AMERICAN JOURNAL OF PSYCHIATRY

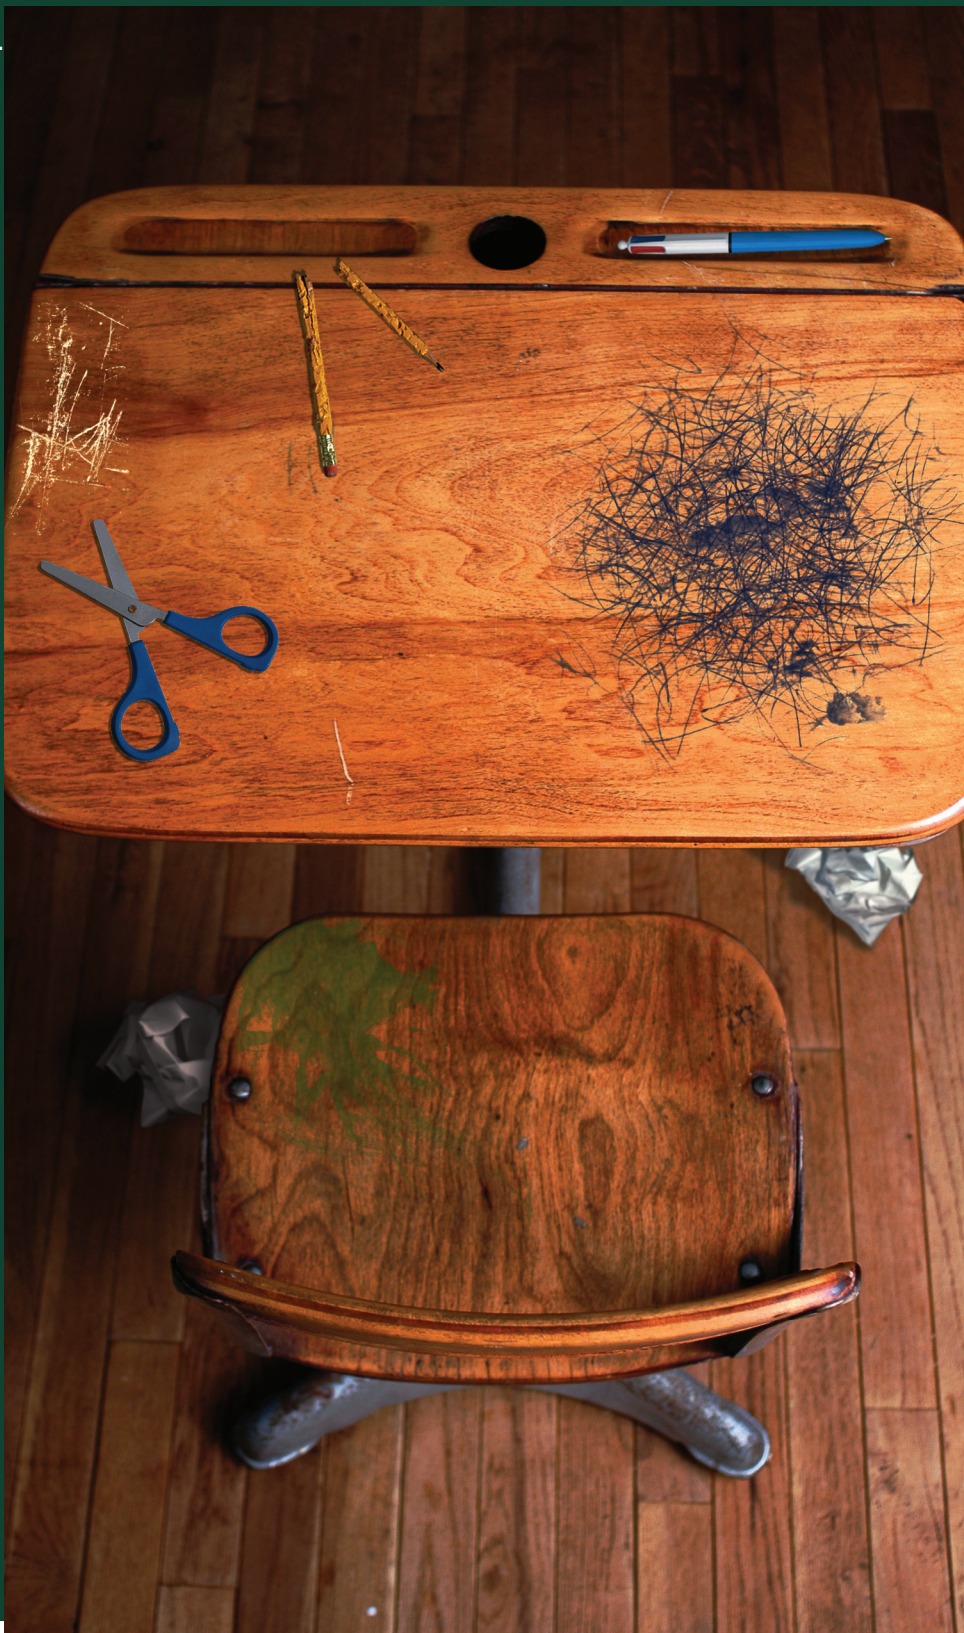

◀ Severe Mood Dysregulation, Irritability, and the Diagnostic Boundaries of Bipolar Disorder in Youths  
Ellen Leibenluft, M.D. 129

Cortical Development in Typically Developing Children With Symptoms of Hyperactivity and Impulsivity: Support for a Dimensional View of Attention Deficit Hyperactivity Disorder  
Philip Shaw, M.D., Ph.D., et al. 143

Comparative Mortality Associated With Ziprasidone and Olanzapine in Real-World Use Among 18,154 Patients With Schizophrenia: The Ziprasidone Observational Study of Cardiac Outcomes (ZODIAC)  
Brian L. Strom, M.D., M.P.H., et al. 193

Real-Time Electronic Ambulatory Monitoring of Substance Use and Symptom Expression in Schizophrenia  
Joel Swendsen, Ph.D., et al. 202

February 2011  
Volume 168 • Number 2

Official Journal of the  
AMERICAN PSYCHIATRIC ASSOCIATION

[ajp.psychiatryonline.org](http://ajp.psychiatryonline.org)
