# The Residents' JOURNAL

**The Residents' JOURNAL** a publication of  
The American Journal of Psychiatry

February 2011 Volume 6 Issue 2

| Inside                                                                                                                                                  | In This Issue                                                                       |                                                                                                                                                                                                                                                                                                                                                                                    |
|---------------------------------------------------------------------------------------------------------------------------------------------------------|-------------------------------------------------------------------------------------|------------------------------------------------------------------------------------------------------------------------------------------------------------------------------------------------------------------------------------------------------------------------------------------------------------------------------------------------------------------------------------|
| 1 In This Issue                                                                                                                                         |                                                                                     |                                                                                                                                                                                                                                                                                                                                                                                    |
| 2 Rating Scales and <i>The Residents' Journal</i><br>Joseph M. Cerimele, M.D.                                                                           |  |                                                                                                                                                                                                                                                                                                                                                                                    |
| 3 Multidisciplinary Inpatient Treatment Approach for Anorexia Nervosa<br>Mariana Markella, M.D.                                                         |                                                                                     |                                                                                                                                                                                                                                                                                                                                                                                    |
| 5 Atypical Antipsychotics for Eating Disorders<br>Michael Rosen, M.D.                                                                                   |                                                                                     |                                                                                                                                                                                                                                                                                                                                                                                    |
| 7 A Case of Olanzapine-Induced Dysphagia<br>Erin McCune, D.O.;<br>Michael Yao, M.D., M.P.H.                                                             |                                                                                     |                                                                                                                                                                                                                                                                                                                                                                                    |
| 9 The Mental Status Examination<br>Paulette Lassiter, M.D.                                                                                              |                                                                                     |                                                                                                                                                                                                                                                                                                                                                                                    |
| 10 Anticipation of Serotonin Syndrome Resulting From Coadministration of Linezolid With a Selective Serotonin Reuptake Inhibitor<br>Fayoz Ibrahim, M.D. |                                                                                     |                                                                                                                                                                                                                                                                                                                                                                                    |
| 12 Test Your Knowledge                                                                                                                                  |                                                                                     |                                                                                                                                                                                                                                                                                                                                                                                    |
| 13 Residents' Journal Info                                                                                                                              |                                                                                     |                                                                                                                                                                                                                                                                                                                                                                                    |
|                                                                                                                                                         |                                                                                     | This issue of <i>The Residents' Journal</i> includes a section theme on eating disorders. First, Mariana Markella, M.D., discusses a multidisciplinary inpatient treatment approach for patients suffering with anorexia nervosa. Next, Michael Rosen, M.D., provides clinical information regarding the use of atypical antipsychotic drugs in the treatment of eating disorders. |

Editor-in-Chief: Joseph M. Cerimele, M.D.  
Associate Editor: Sarah M. Fayad, M.D.  
Editors Emeriti: Sarah B. Johnson, M.D., Molly McVay, M.D.  
Guest Section Editor: Michael Rosen, M.D.  
Staff Editor: Angela Moore

The Residents' Journal accepts manuscripts authored by medical students, resident physicians, and fellows. To submit your paper, please visit the manuscript submission site at [mc.manuscriptcentral.com/appi-ajp](http://mc.manuscriptcentral.com/appi-ajp) and either create an account or use your existing account. For manuscript type, select "Residents." Then follow the instructions to upload your manuscript. Residents who are interested in participating as Guest Section Editors should e-mail the Residents' Journal Editor-in-Chief Joseph Cerimele at [joseph.cerimele@mssm.edu](mailto:joseph.cerimele@mssm.edu).

See the September 2010 issue for details on the new peer review process.

The Residents' Journal is sent free-of-charge to all psychiatry residents. Anyone interested in being included on the distribution list should contact Angela Moore, the Residents' Journal staff editor at [ajp@psych.org](mailto:ajp@psych.org) with "Subscribe to Residents' Journal" in the subject line.

## Upcoming Issue Themes

April: Psychosomatic Medicine

May: Exercise and Psychiatric Disorders

To access the complete Residents' Journal archives, visit [ajp.psychiatryonline.org/misc/Residents\\_Journal.dtl](http://ajp.psychiatryonline.org/misc/Residents_Journal.dtl)

# READ The American Journal of PSYCHIATRY ONLINE

## ONLINE BENEFITS

### AJP in Advance

Receive key research articles posted on the AJP website well in advance of their appearance in print.

### Back Issue Access

Gain access to back issues starting with Volume 1, Issue 1 of the American Journal of Insanity in 1844. (Available to institutions as a separate one-time purchase.)

### AJP CME

Take interactive quizzes that offer AMA PRA Category 1 Credits™ for selected articles from each issue (with paid subscription to the CME Course Program).

### AJP Audio

Listen to MP3-format program summarizing findings from key articles from each issue.

### Residents' Journal

Read additional AJP articles and features that have most value to residents in their training.

### Powerful Searching

Search by author, keyword, and/or citation details—within any one journal, across the entire PsychiatryOnline journal collection, or across all HighWire journals.

### PubMed, CrossRef, and Google Scholar links

Explore everything from cited references to abstracts and full text; to similar articles; to other articles by the same lead authors.

### eTOCs

Get advanced email alerts with the table of contents of the latest issue.

ACTIVATE NOW!

IT'S AS EASY AS...

2 Under SUBSCRIBE NOW, click "Activate Your Online Access"

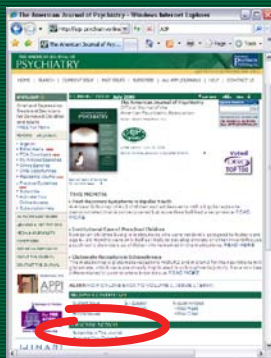

3 Go to [ajp.psychiatryonline.org](http://ajp.psychiatryonline.org)  
Enter your APA Member Number. (This can be found on your mailing label.)

AJP 3000056866 CAR-RT LOT88 C-105  
John Q Sample  
Mental Health Professional  
1000 Wilson Blvd STE 1825  
Arlington VA 22209-3924 01654

\*In most cases the number on your label will be your Member Number; if it is not, enter your APA Member Number (with enough leading zeros to create 10 digits).

For more information or if you cannot locate your customer number, please contact APPI Customer Service:

1.800.368.5777  
APPI@PSYCH.ORG

# get CME from AJP

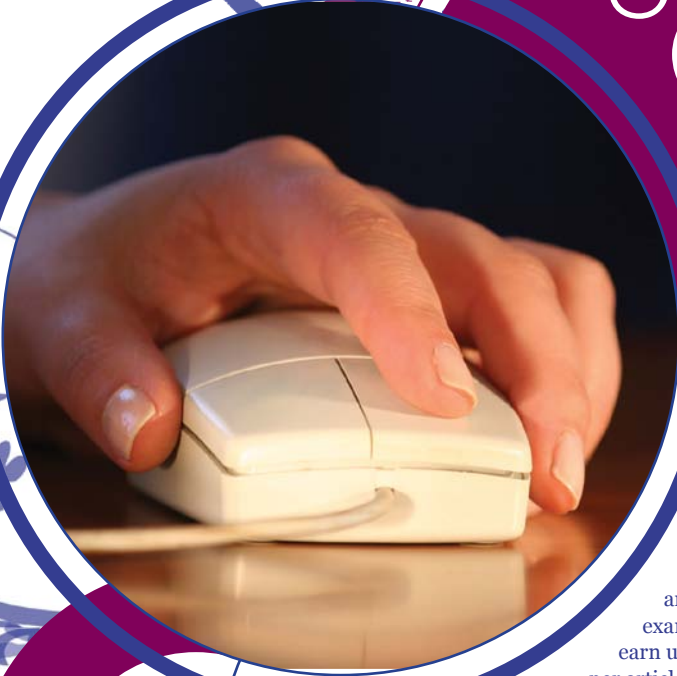

Brief companion exams are created for three of the most influential articles from each issue. By reading the articles and completing the online exams, you can test your knowledge and earn up to 1 *AMA PRA Category 1 Credit™* per article. Correct answers are highlighted for your reference upon completion of the course; there is no minimum threshold score necessary for the credit. A

link from the question to the correct answer in context will also be highlighted in the associated article, thus extending the learning experience.

CME credit is only provided online, and a subscription to the AJP CME program is required. From the moment you subscribe to the AJP CME program, you will be able to select from 72 courses from among 40 possible subject areas. You'll also be able to access the next 33 courses as they become available. For more information and pricing, please go to <http://cme.psychiatryonline.org/misc/aboutajpcme.shtml>

This activity is sponsored by the American Psychiatric Association. The American Psychiatric Association is accredited by the Accreditation Council for Continuing Medical Education to provide continuing medical education for physicians. The American Psychiatric Association designates each educational activity for a maximum of 1 *AMA PRA Category 1 Credit™*. Physicians should only claim credit commensurate with the extent of their participation in the activity.

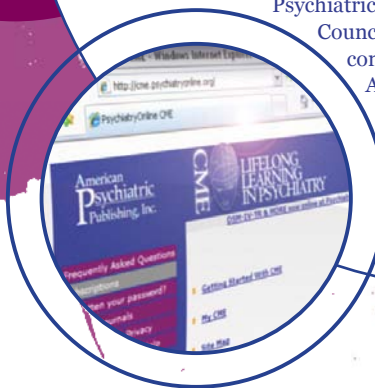

Fulfill your CME requirement while staying current on the latest advances in psychiatry.  
Subscribe to AJP CME!

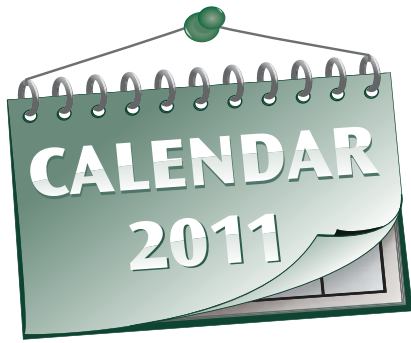

For free listing of your organization's official annual or regional meeting, please send us the following information: sponsor, location, inclusive dates, type and number of continuing education credits (if available), and the name, address, and telephone number of the person or group to contact for more information. In order for an event to appear in our listing, all notices and changes must be received at least 6 months in advance of the meeting and should be addressed to:

**Calendar, American Journal of Psychiatry, 1000 Wilson Boulevard, Suite 1825, Arlington, VA 22209-3901, [swstrate@psych.org](mailto:swstrate@psych.org) (e-mail).**

*Because of space limitations, only listings of meetings of the greatest interest to Journal readers will be included.*

---

## MARCH 2011

**March 27–29**, Inaugural Conference of the Rotman Research Institute and the Kunin-Lunenfeld Applied Research Unit, Toronto, Canada. Contact: Paula Ferreira, 416-785-2500, ext. 2363 (tel), [pferreira@baycrest.org](mailto:pferreira@baycrest.org) (e-mail), [www.rotman-baycrest.on.ca](http://www.rotman-baycrest.on.ca) (web site)

---

## MAY

**May 12–14**, 55th Annual Meeting of the American Academy of Psychoanalysis and Dynamic Psychiatry. Contact: AAPDP Executive Office, P.O. Box 30, Bloomfield, CT 06002; (888) 691-8281 (tel), (860) 286-0787 (fax), [info@aapdp.org](mailto:info@aapdp.org) (e-mail), [www.aapdp.org](http://www.aapdp.org) (web site).

**May 14–19**, 164th Annual Meeting of the American Psychiatric Association, Honolulu, HI. Contact: Cathy Nash, APA Annual Meetings Dept., 1000 Wilson Blvd., Ste. 1825, Arlington, VA 22209; (703) 907-7822.

**May 26–29**, 3rd International Congress on ADHD – From Childhood to Adult Disease, Berlin, Germany. Contact: Congress and Exhibition Office: CPO HANSER SERVICE, 011-49-40-670 88 20 (tel), [www.adhd-congress.org](http://www.adhd-congress.org) (web site), [adhd2011@cpo-hanser.de](mailto:adhd2011@cpo-hanser.de) (e-mail).

---

## OCTOBER

**October 5–8**, II International Congress, Dual Disorders, Addictive Behaviors and other Mental Disorders, Barcelona, Spain. Contact: SEPD, [www.cipd2011.com](http://www.cipd2011.com) (web site).

**October 18–23**, 58th Annual Meeting of the American Academy of Child and Adolescent Psychiatry, Toronto, Ontario. Contact: AACAP, 3615 Wisconsin Avenue, N.W., Washington, DC 20016-3007; (202) 966-7300 (tel), (202) 966-2891 (fax), [meetings@aacap.org](mailto:meetings@aacap.org) (e-mail), [www.aacap.org](http://www.aacap.org) (web site).

**October 27–30**, 63rd Institute on Psychiatric Services, American Psychiatric Association, San Francisco, CA. Contact: Jill Gruber, APA Annual Meetings Dept., 1000 Wilson Blvd., Ste. 1825, Arlington, VA 22209; (703) 907-7815.

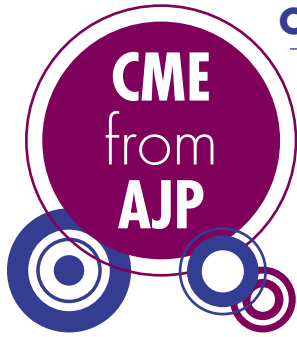

## Continuing Medical Education

Three articles in this issue form the basis of a short course with questions that can be answered for up to 1 *AMA PRA Category 1 Credit™* each by visiting <http://cme.psychiatryonline.org/> and clicking on “American Journal of Psychiatry CME.”

CME credit is issued only online, and a paid subscription to the AJP CME course program is required.

This month’s courses appear on pages 337–340.

**FREE AUDIO!**

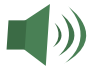

## Have You Heard?

You can listen to highlights of *The American Journal of Psychiatry* by downloading a monthly free .mp3 audio file from our web site (<http://ajp.psychiatryonline.org/misc/audio.dtl>) or by subscribing to the AJP Audio podcast at iTunes or other feed reader (e.g., NewzCrawler, FeedDemon, Bloglines, Google Reader). Presented by Deputy Editor Dr. Susan Schultz or by Editorial Director Michael Roy, each month’s audio lasts approximately 30 minutes and covers several research articles, the Treatment in Psychiatry feature, and one or two editorials.

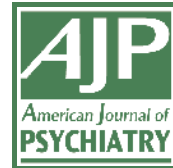

Coming in the April 2011 issue\*

## THE AMERICAN JOURNAL OF PSYCHIATRY

Effectiveness of Mental Health Screening and Coordination of In-Theater Care Prior to Deployment to Iraq: A Cohort Study

C.H. Warner, G.N. Appenzeller, J.R. Parker, C.M. Warner, and C.W. Hoge

Longitudinal Follow-Up of Bipolar Disorder in Women With Premenstrual Exacerbation: Findings From STEP-BD

R.S. Dias, B. Lafer, C. Russo, A. Del Debbio, A.A. Nierenberg, G.S. Sachs, and H. Joffe

Effect of Nicotine Replacement Therapy on Agitation in Smokers With Schizophrenia: A Double-Blind, Randomized, Placebo-Controlled Study

M.H. Allen, M. Debanné, C. Lazignac, E. Adam, L.M. Dickinson, and C. Damsa

Evaluation of Functionally Meaningful Measures for Clinical Trials of Cognition Enhancement in Schizophrenia

M.F. Green, N.R. Schooler, R.S. Kern, F.J. Frese, W. Granberry, P.D. Harvey, C.N. Karson, N. Peters, M. Stewart, L.J. Seidman, J. Sonnenberg, W.S. Stone, D. Walling, E. Stover, and S.R. Marder

**\*Can’t wait? Visit [ajp.psychiatryonline.org](http://ajp.psychiatryonline.org) and click the “AJP in Advance” logo to see all articles uploaded in advance of print!**

# BJPsych

## Contents

- A7 Editorial Board  
A9 Highlights of this issue

### Editorials

- 167 **Will current socioeconomic trends produce a depressing future for men?**  
B. W. Dunlop and T. Mletzko
- 169 **Domestic violence: the hidden epidemic associated with mental illness**  
K. Hegarty
- 171 **Will the child with mania please stand up?**  
G. A. Carlson

### Reappraisal

- 173 **Neurodevelopmental hypothesis of schizophrenia**  
M. J. Owen, M. C. O'Donovan, A. Thapar and N. Craddock

### Special article

- 176 **Contribution and legacy of John Wing, 1923–2010**  
T. S. Brugha, L. Wing, J. Cooper and N. Sartorius

### Review article

- 179 **Pharmacological interventions for people with depression and chronic physical health problems: systematic review and meta-analyses of safety and efficacy**  
D. Taylor, N. Meader, V. Bird, S. Pilling, F. Creed and D. Goldberg on behalf of the pharmacology subgroup of the National Institute for Health and Clinical Excellence Guideline Development Group for Depression in Chronic Physical Health Problems

### Papers

- 189 **Barriers and facilitators of disclosures of domestic violence by mental health service users: qualitative study**  
D. Rose, K. Trevillion, A. Woodall, C. Morgan, G. Feder and L. Howard
- 195 **Prevalence of bipolar disorder in children and adolescents with attention-deficit hyperactivity disorder**  
A. Hassan, S. S. Agha, K. Langley and A. Thapar
- 199 **Longitudinal neuroimaging correlates of subjective memory impairment: 4-year prospective community study**  
R. Stewart, O. Godin, F. Crivello, P. Maillard, B. Mazoyer, C. Tzourio and C. Dufouil

- 205 **Intimacy – poems by doctors**  
Roy Salole

- 206 **Psychiatric history and subthreshold symptoms as predictors of the occurrence of depressive or anxiety disorder within 2 years**  
J. Karsten, C. A. Hartman, J. H. Smit, F. G. Zitman, A. T. F. Beekman, P. Cuijpers, A. J. W. van der Does, J. Ormel, W. A. Nolen and B. W. J. H. Penninx

- 212 **The case of King Saul: did he have recurrent unipolar depression or bipolar affective disorder? – psychiatry in the Old Testament**  
George Stein

- 213 **Regional brain activation/deactivation during word generation in schizophrenia: fMRI study**  
J. P. John, H. N. Halahalli, M. K. Vasudev, P. N. Jayakumar and S. Jain

- 223 **Neural activation and radial diffusivity in schizophrenia: combined fMRI and diffusion tensor imaging study**  
K. Koch, G. Wagner, C. Schachtzabel, C. C. Schultz, D. Güllmar, J. R. Reichenbach, H. Sauer and R. G. M. Schlösser

- 230 **Internet-based cognitive-behavioural therapy for severe health anxiety: randomised controlled trial**  
E. Hedman, G. Andersson, E. Andersson, B. Ljótsson, C. Rück, G. J. G. Asmundson and N. Lindefors

- 236 **We all have human rights – in 100 words**  
Martin Curtice

### Short report

- 237 **Postnatal depression in women after unsuccessful attempted abortion**  
A. B. Ludermir, R. Araya, T. V. B. de Araújo, S. A. Valongueiro and G. Lewis

### Columns

- 239 Correspondence  
241 Correction

- 241 **The man behind Philippe Pinel: Jean-Baptiste Pussin (1746–1811) – psychiatry in pictures**  
Jean-Pierre Schuster, Nicolas Hoertel and Frédéric Limosin

- 242 Book reviews  
244 Contents of *Advances in Psychiatric Treatment*  
245 Contents of the *American Journal of Psychiatry*  
246 From the Editor's desk

### Cover picture

*Twisted Emotion.*  
Figgy Fox (1959–2006)

Figgy Fox, whose work we featured in July 2009, started drawing in 1987. At first he saw it as an activity to alleviate boredom but it soon became a necessity. He would paint for up to 12 hours at a time. The ideas came to him in the form of visions and dreams or nightmares. He often said that the imagery and recurrent symbols were a direct result of his psychosis and the isolation he felt. Figgy's artwork expressed his reaction to admissions to psychiatric hospitals; his battles with his addiction to drugs and alcohol; and his experience of depression and psychosis. This powerful and disturbing image amply illustrates the title: *Twisted Emotion*.

Reproduced with permission of the copyright holder: The Bethlem Art and History Collections Trust, Bethlem Royal Hospital, Monks Orchard Road, Beckenham, Kent BR3 3BX, with thanks to Colin Gale, Archivist, and Beth Elliot.

We are always looking for interesting and visually appealing images for the cover of the *Journal* and would welcome suggestions or pictures, which should be sent to Dr Allan Beveridge, British Journal of Psychiatry, 17 Belgrave Square, London SW1X 8PG, UK or [bjp@rcpsych.ac.uk](mailto:bjp@rcpsych.ac.uk).

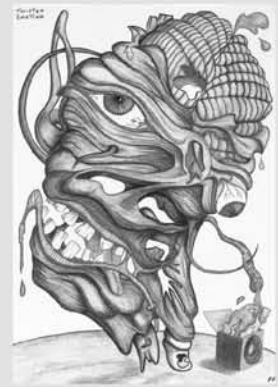

Source: https://ajp.psychiatryonline.org/doi/suppl/10.1176/ajp.2011.168.issue-2/suppl_file/front.pdf
